# Supplementary material for: Improved photophysical properties and durability of CsPbBr3 NCs endowed by inorganic oxoacid and bromide ions
Source: Royal Society of Chemistry journal article supplement (doi:10.1039/d1nr01198g), 2021-01-01
Supplement: d1nr01198g1.pdf [file d1nr01198g1.pdf]

## Supplementary Information

### **Improved photophysical properties and durability of CsPbBr<sub>3</sub> NCs endowed by inorganic oxoacid and bromide ions**

*Shuhua Chen,<sup>‡,a</sup> Qixuan Zhong,<sup>‡,a</sup> Jun Liu,<sup>a</sup> Wenhao Guan,<sup>a</sup> Pengli Li,<sup>a</sup> Israr Mahmood,<sup>a</sup> Muhan Cao<sup>\*,a</sup> and Qiao Zhang<sup>a</sup>*

<sup>a</sup>Institute of Functional Nano and Soft Materials (FUNSOM), Jiangsu Key Laboratory for Carbon-Based Functional Materials and Devices, Soochow University, 199 Ren'ai Road, Suzhou, 215123, Jiangsu, People's Republic of China

E-mail: mhcao@suda.edu.cn (M.C.)

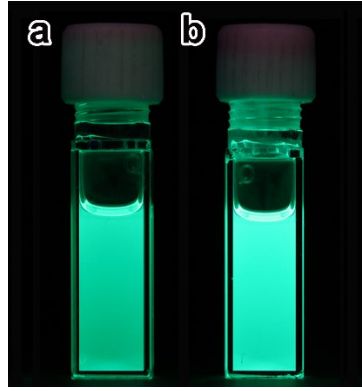

**Fig. S1.** Photographs of (a) CsPbBr<sub>3</sub> and (b) CsPbBr<sub>3</sub>-P-Br NC solution under 365 nm UV light.

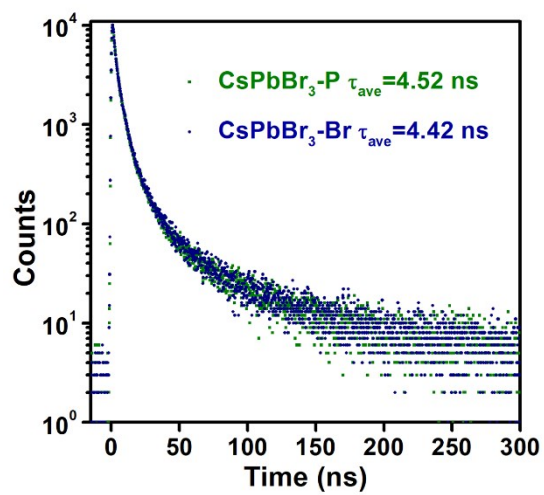

**Fig. S2.** Time-resolved PL decay curves of CsPbBr<sub>3</sub>-P NCs and CsPbBr<sub>3</sub>-Br NCs.

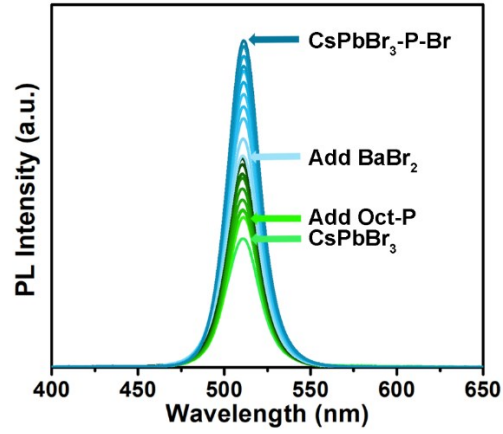

**Fig. S3.** *In-situ* PL intensity during the reaction process. Oct-P was added and kept for 20 min in the first step, followed by adding  $\text{BaBr}_2$  solution and reacted for another 20 min. Time interval is 2 min.

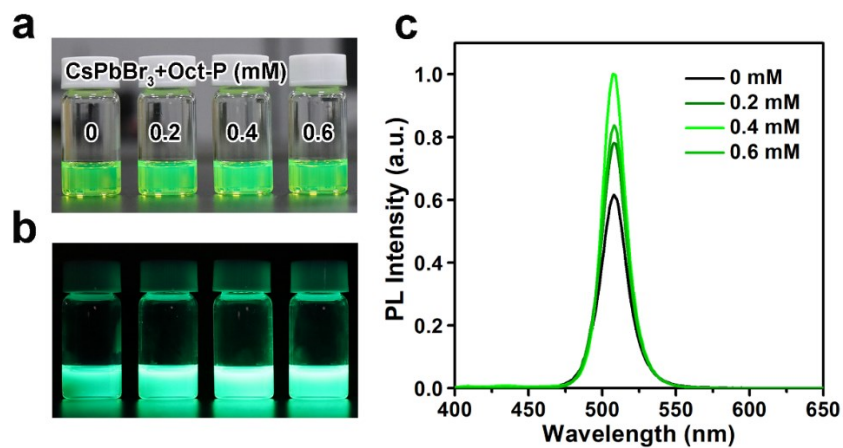

**Fig. S4.** Photographs of CsPbBr<sub>3</sub> NCs treated by Oct-P with different concentrations under (a) daylight and (b) 365 nm UV light. (c) PL intensity of CsPbBr<sub>3</sub> NCs treated by Oct-P with different concentrations.

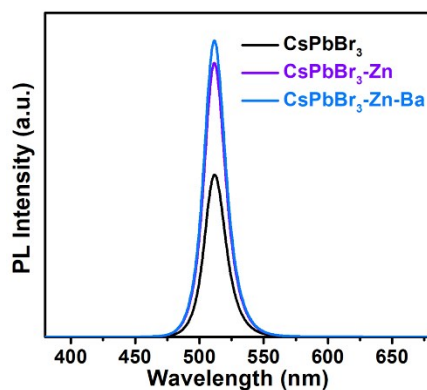

**Fig. S5.** PL spectra of pristine CsPbBr<sub>3</sub> NCs, CsPbBr<sub>3</sub>-Zn NCs and CsPbBr<sub>3</sub>-Zn-Ba NCs.

To further confirm the role of Ba<sup>2+</sup>, we carried out a controlled experiment, in which CsPbBr<sub>3</sub>-P NCs were passivated by ZnBr<sub>2</sub> (1 mM) followed by Ba(C<sub>2</sub>H<sub>3</sub>O<sub>2</sub>)<sub>2</sub> (1 mM). PL spectra in Fig. S5 show that the PL intensity of CsPbBr<sub>3</sub> NCs increases from 70% to 92% upon the addition of ZnBr<sub>2</sub>, and further enhanced to 95% in the presence of Ba(C<sub>2</sub>H<sub>3</sub>O<sub>2</sub>)<sub>2</sub>, very closed to that of BaBr<sub>2</sub> (97%). It can be concluded Ba<sup>2+</sup> can acts as a passivator for CsPbBr<sub>3</sub> but no significant improvement can be found when compared with Zn, Pb and Na, probably due to its trace amount.

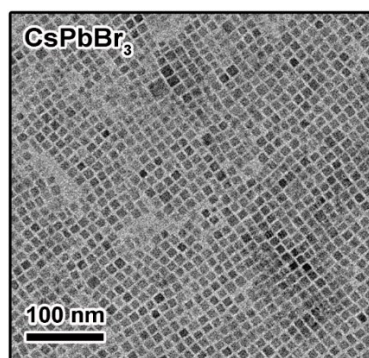

**Fig. S6.** TEM image of pristine CsPbBr<sub>3</sub> NCs.

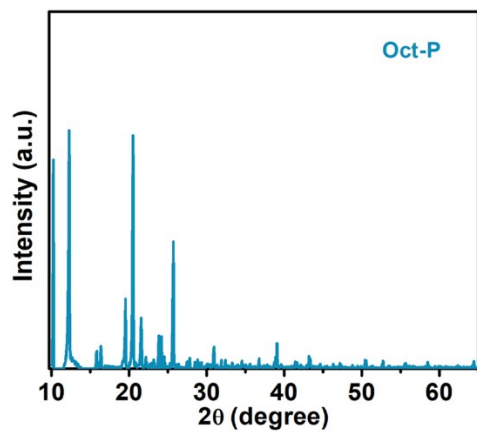

**Fig. S7.** XRD pattern of the prepared Oct-P powder.



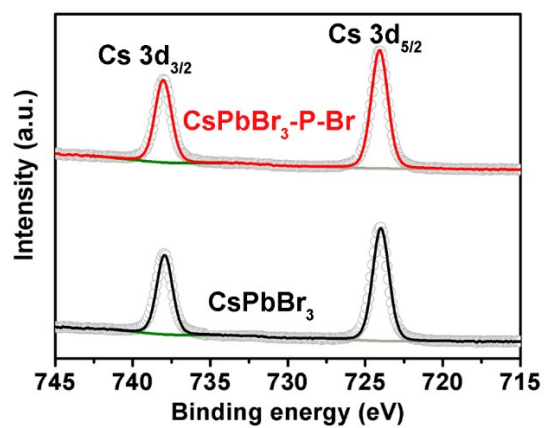

**Fig. S8.** XPS spectra of Cs 3d from CsPbBr<sub>3</sub>-P-Br NCs and CsPbBr<sub>3</sub> NCs.

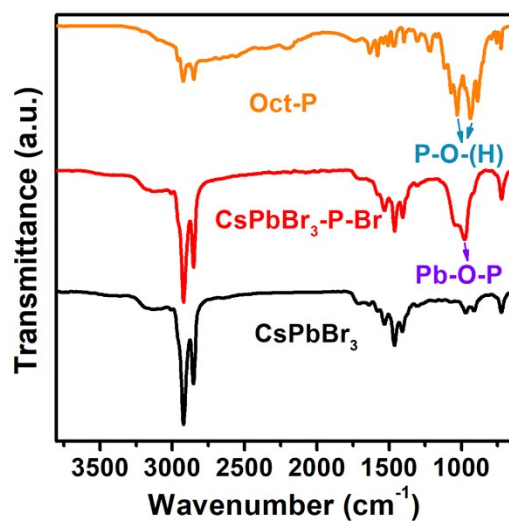

**Fig. S9.** Fourier transform infrared spectroscopy (FTIR) spectra of Oct-P, pristine CsPbBr<sub>3</sub> and CsPbBr<sub>3</sub>-P-Br NCs.

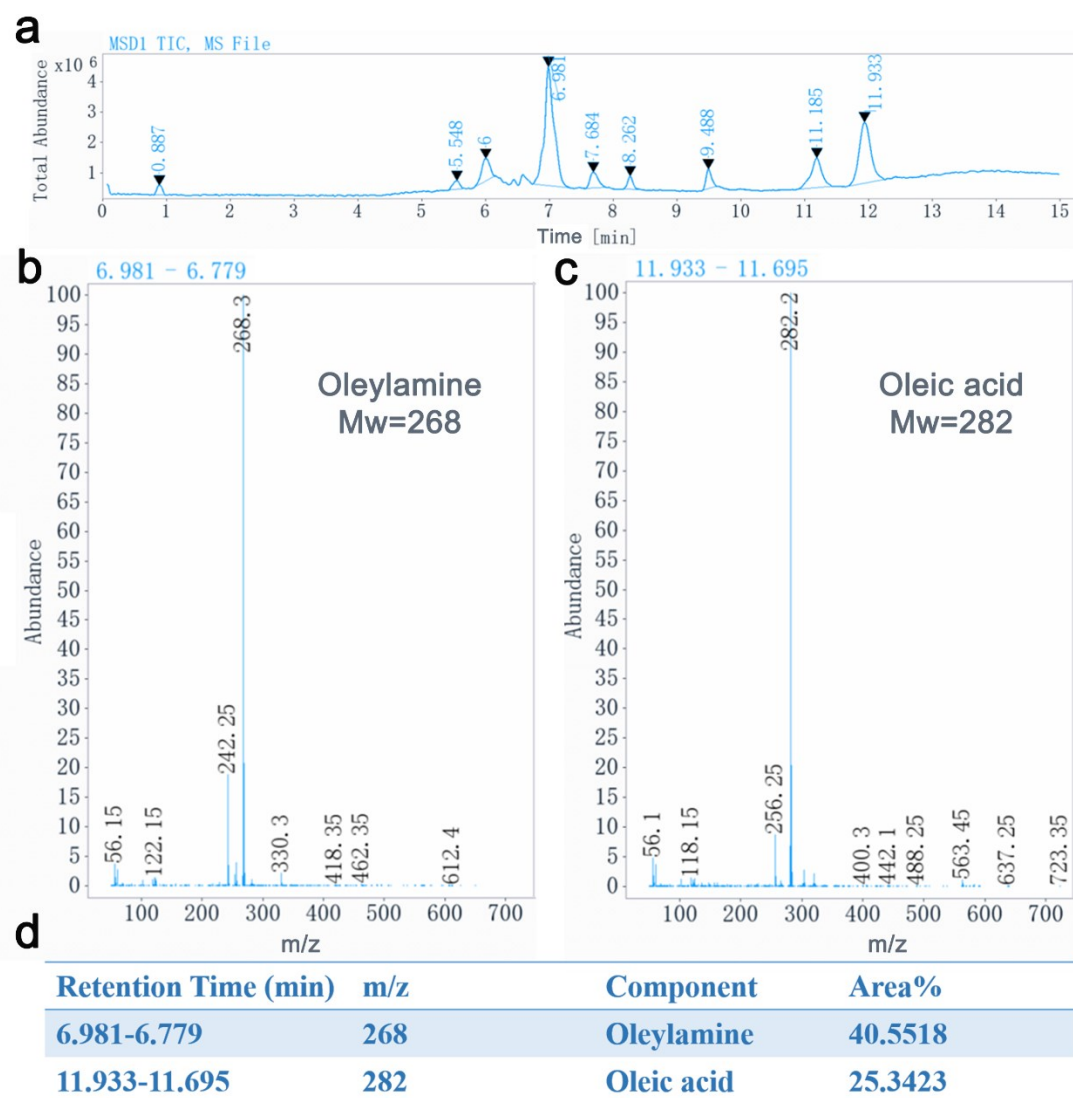

**Fig. S10.** (a) Chromatogram from HPLC analyses of pristine CsPbBr<sub>3</sub> NCs. MS spectra at retention times of (b) 6.981-6.779 min, (c) 11.933-11.695 min and (d) a table showing the ratio.

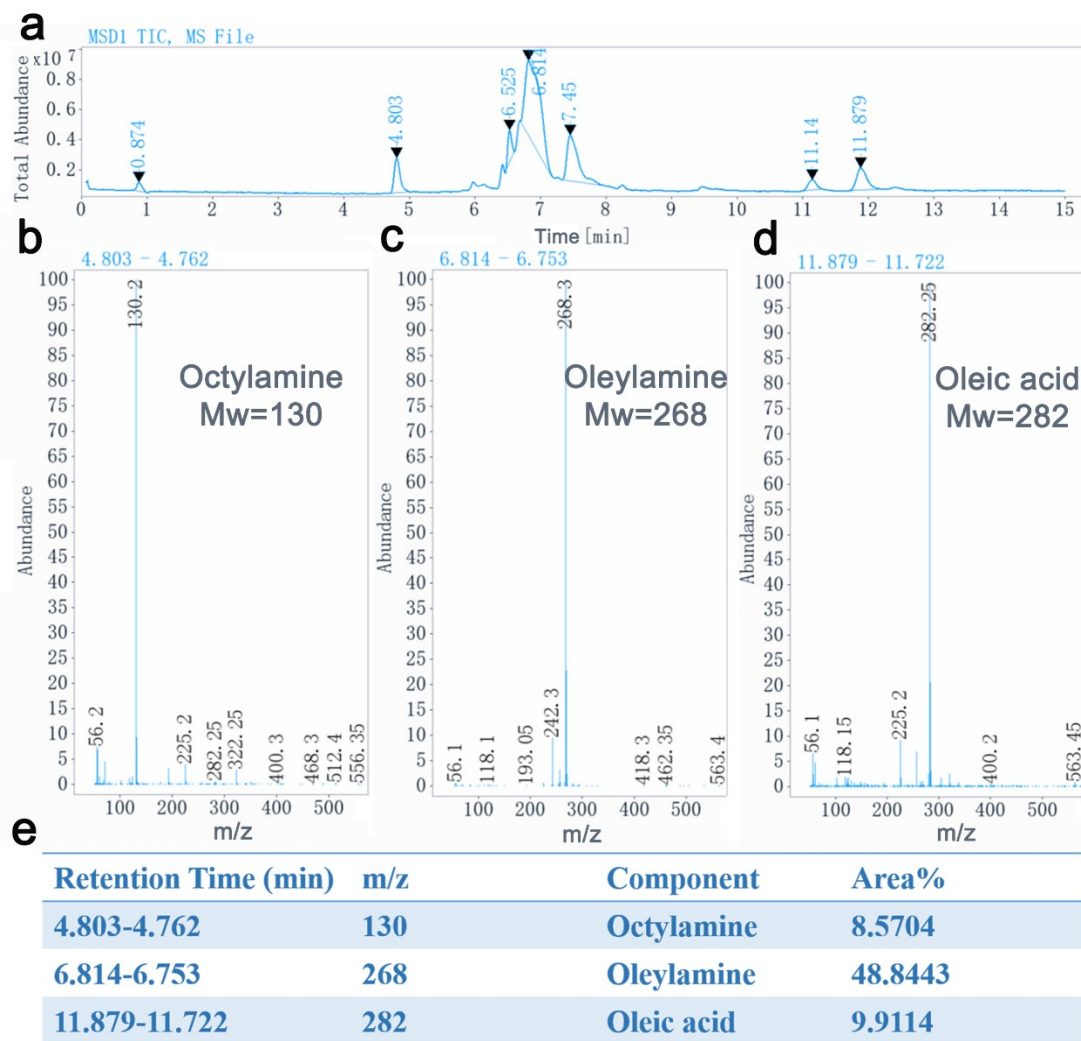

**Fig. S11.** (a) Chromatogram from HPLC analyses of CsPbBr<sub>3</sub>-P NCs purified by centrifugation. MS spectra at retention times of (b) 4.803-4.762 min, (c) 6.814-6.753 min, (d) 11.879-11.722 min and (e) a table showing the ratio.

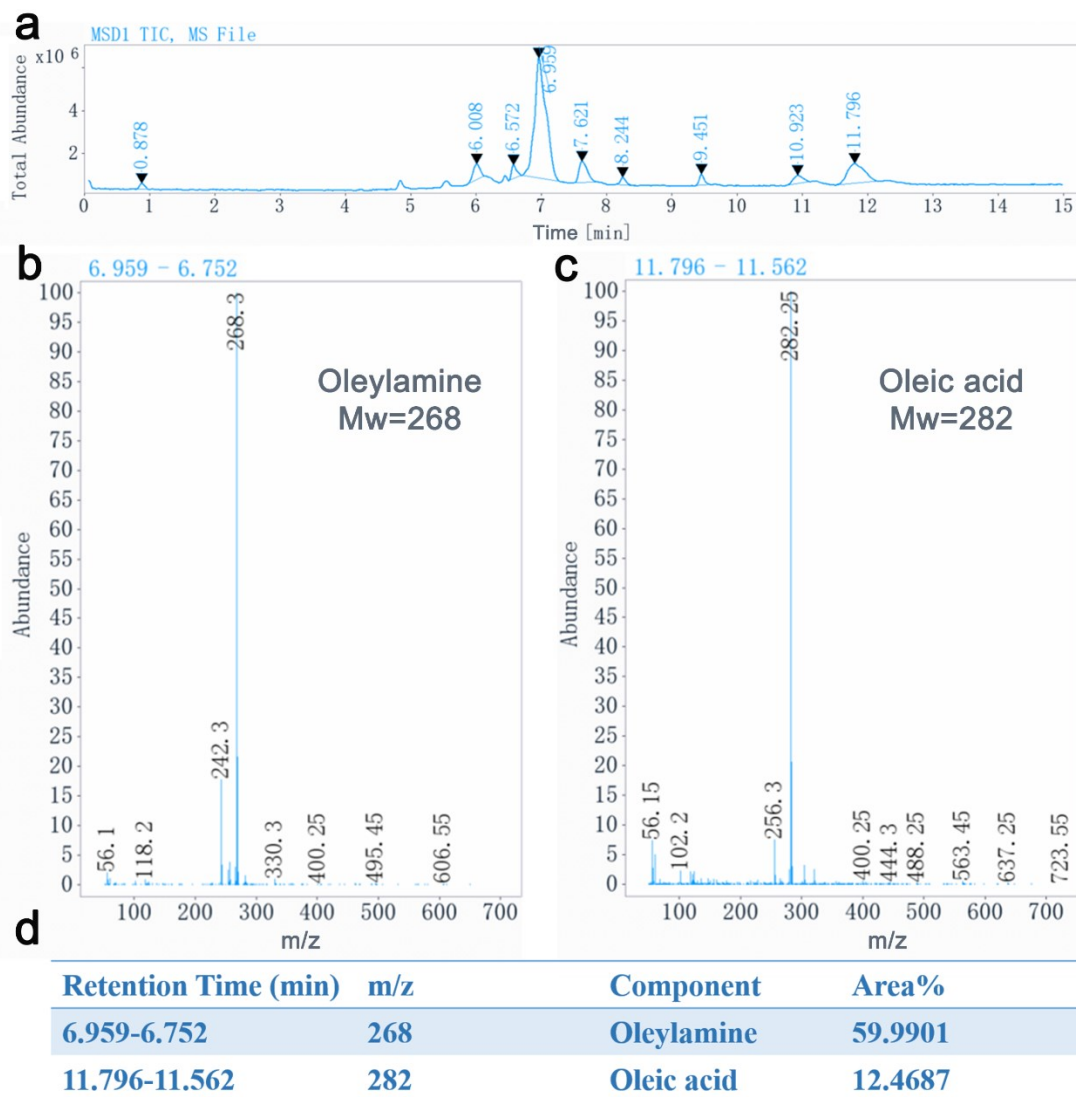

**Fig. S12.** (a) Chromatogram from HPLC analyses of CsPbBr<sub>3</sub>-P NCs purified by ethyl acetate. MS spectra at retention times of (b) 6.959-6.752 min, (c) 11.796-11.562 min and (d) a table showing the ratio.

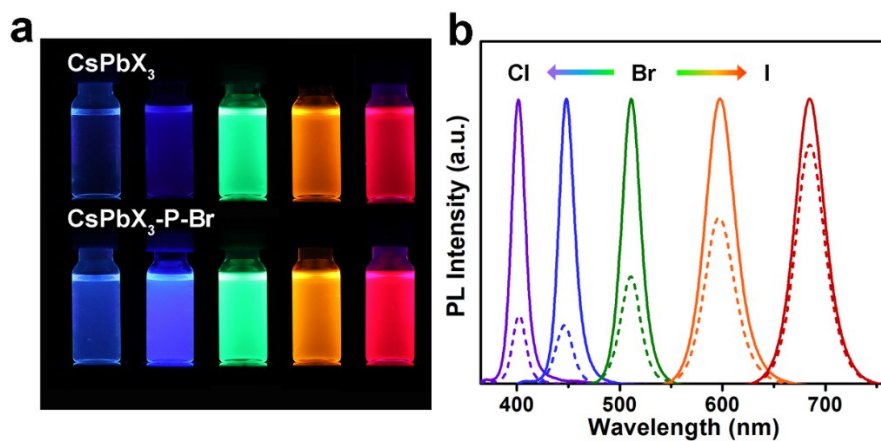

**Fig. S13.** (a) Photographs of  $\text{CsPbX}_3$  NCs and  $\text{CsPbX}_3\text{-P-Br}$  NCs under 365 nm UV light ( $X=\text{Cl}, \text{Cl}_{0.5}\text{Br}_{0.5}, \text{Br}, \text{Br}_{0.5}\text{I}_{0.5}, \text{I}$ , from left to right); (b) Corresponding PL intensity of  $\text{CsPbX}_3$  NCs and  $\text{CsPbX}_3\text{-P-Br}$  NCs, dashed lines are pristine  $\text{CsPbX}_3$ , and solid lines are  $\text{CsPbX}_3\text{-P-Br}$ .

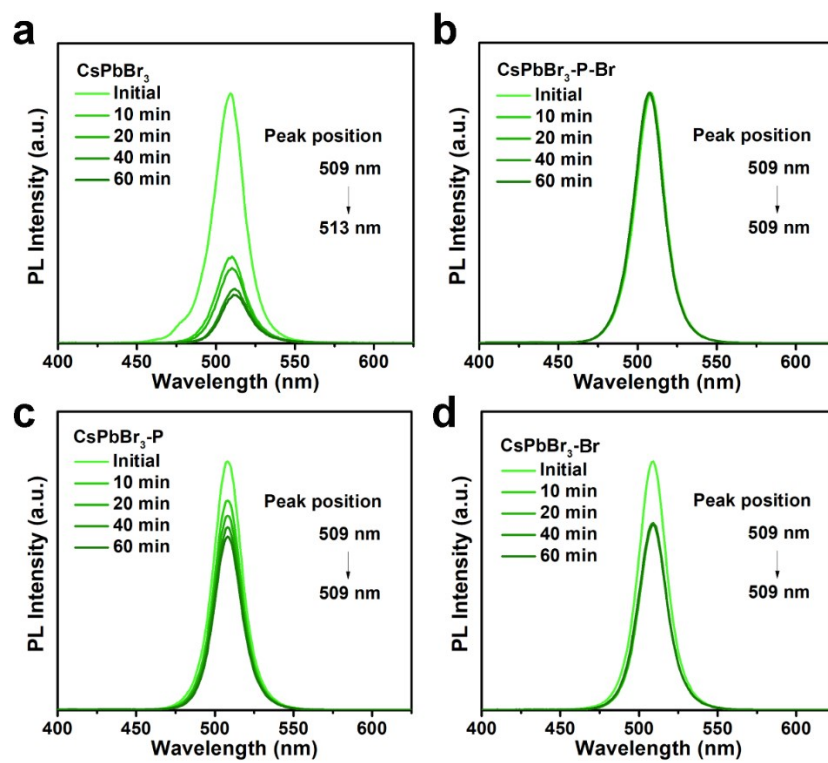

**Fig. S14.** Time-dependent PL spectra of (a)  $\text{CsPbBr}_3$ , (b)  $\text{CsPbBr}_3\text{-P-Br}$ , (c)  $\text{CsPbBr}_3\text{-P}$ , and (d)  $\text{CsPbBr}_3\text{-Br}$  in the presence of acetone.

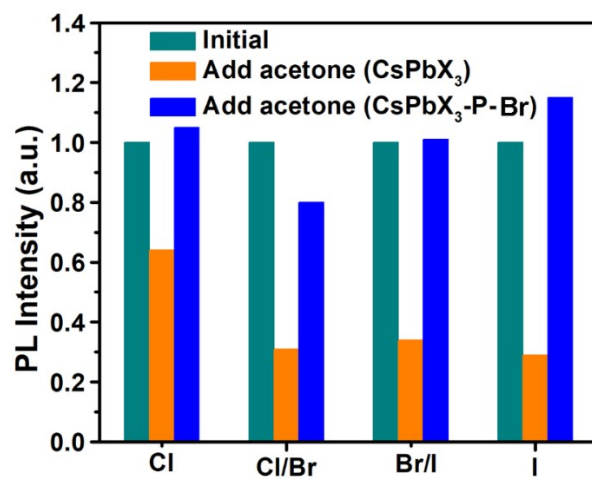

**Fig. S15.** PL intensity change of CsPbX<sub>3</sub> NCs and CsPbX<sub>3</sub>-P-Br NCs (X=Cl, Cl<sub>0.5</sub>Br<sub>0.5</sub>, Br<sub>0.5</sub>I<sub>0.5</sub>, I) after adding acetone for 60 min.



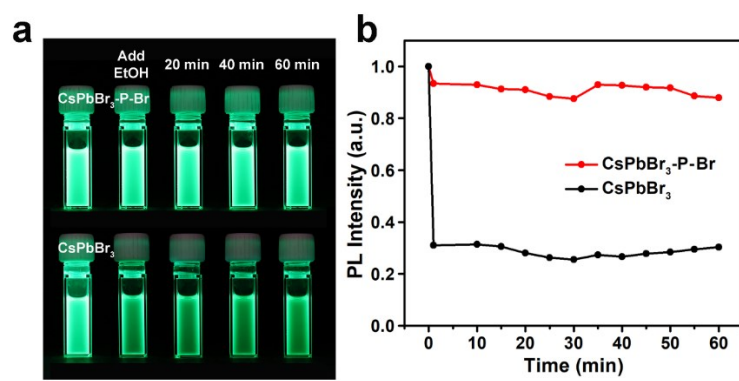

**Fig. S16.** (a) Photographs of CsPbBr<sub>3</sub>-P-Br and CsPbBr<sub>3</sub> NCs after adding 100 μL ethanol under 365 nm UV light, (b) corresponding PL intensity change.

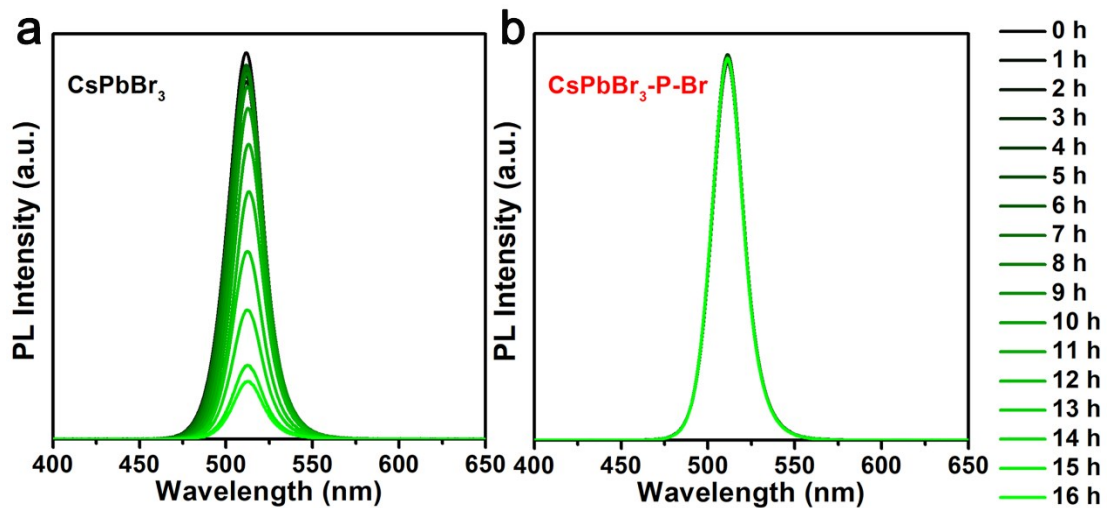

**Fig. S17.** Time-dependent PL spectra of (a) CsPbBr<sub>3</sub> NCs and (b) CsPbBr<sub>3</sub>-P-Br NCs under 365 nm UV light illumination.

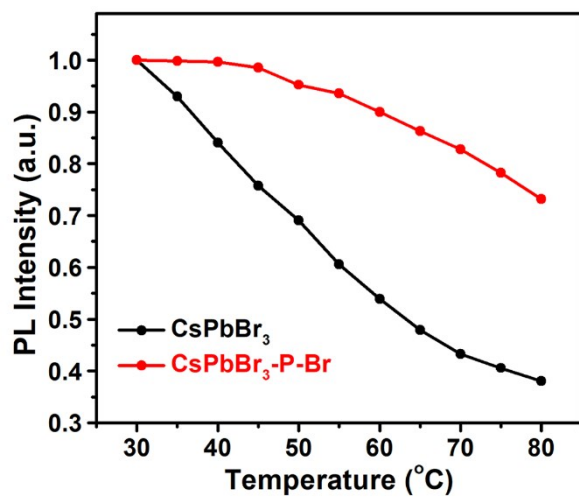

**Fig. S18.** Temperature-dependent PL intensity of CsPbBr<sub>3</sub> NCs and CsPbBr<sub>3</sub>-P-Br NCs.

**Table S1.** Detailed information of PL decay.

|                           | $\tau_1$ (ns) | $A_1$ (%) | $\tau_2$ (ns) | $A_2$ (%) | $\tau_3$ (ns) | $A_3$ (%) | $\tau_{\text{ave}}$ (ns) |
|---------------------------|---------------|-----------|---------------|-----------|---------------|-----------|--------------------------|
| CsPbBr <sub>3</sub>       | 7.66          | 21        | 51.8          | 1         | 2.34          | 78        | 3.95                     |
| CsPbBr <sub>3</sub> -P    | 7.75          | 26        | 42.9          | 2         | 2.3           | 72        | 4.52                     |
| CsPbBr <sub>3</sub> -Br   | 7.13          | 32        | 37.1          | 2         | 2.12          | 66        | 4.42                     |
| CsPbBr <sub>3</sub> -P-Br | 4.29          | 97        | 16.6          | 3         | -             | -         | 4.66                     |

From the results, CsPbBr<sub>3</sub>-P and CsPbBr<sub>3</sub>-Br NCs have a PL lifetime of 4.52 ns and 4.42 ns, respectively, which are longer than that of pristine CsPbBr<sub>3</sub> but shorter than that of CsPbBr<sub>3</sub>-P-Br. From their detailed components, it can be found that the photon-radiative recombination  $\tau_1$  increases from 21% to 26% (CsPbBr<sub>3</sub>-P), 32% (CsPbBr<sub>3</sub>-Br) and finally to 97% (CsPbBr<sub>3</sub>-P-Br). The longer-lived component  $\tau_2$  may be ascribed to the shallow trap-mediated radiative recombination, which has no significant change upon the treatment.  $\tau_3$ , the indirect-radiative recombination, decreases to 72% (CsPbBr<sub>3</sub>-P), 66% (CsPbBr<sub>3</sub>-Br), and vanishes upon the two-step treatment, suggesting that the trap states are removed from the NCs. From the values, it seems that Br<sup>-</sup> ions can better passivate CsPbBr<sub>3</sub> NCs. However, PO<sub>4</sub><sup>3-</sup> is found to play a significant role in tuning the long-chain capping ligand composition (Fig. S10-S12), which is found to be a key step for the subsequent Br<sup>-</sup> treatment.

**Table S2.** Atomic fraction of Cs, Pb, Br, P, Ba determined from EDX element mapping.

| Elements            | Cs    | Pb    | Br    | P    | Ba  |
|---------------------|-------|-------|-------|------|-----|
| Atomic Fraction (%) | 18.71 | 19.52 | 56.48 | 4.89 | 0.4 |

**Table S3.** Zeta potential values of different samples in toluene.

|                           | Positive voltage<br>(mV) | Negative voltage<br>(mV) | Average voltage<br>(mV) |
|---------------------------|--------------------------|--------------------------|-------------------------|
| CsPbBr <sub>3</sub>       | 10.82                    | 11.91                    | 11.36                   |
| CsPbBr <sub>3</sub> -P    | 52.81                    | 43.93                    | 48.37                   |
| CsPbBr <sub>3</sub> -Br   | -9.07                    | -10.4                    | -9.73                   |
| CsPbBr <sub>3</sub> -P-Br | 25.94                    | 25.10                    | 25.52                   |

\*Due to the low conductivity of nonpolar solvent toluene, we selected positive voltage and negative voltage for zeta potential measurement. All the samples were washed by ethyl acetate prior to the test.
